# Supplementary material
Source: publisher figshare collection journal article supplement (https://sage.figshare.com/ndownloader/files/16705379)
Supplement: Supplementary file 1 [file 16705379]

**Supplementary Table S2. Additional calibration results for *default model* simulation of adults with relapsing-onset MS, ages 30 to life expectancy.**

|                                                           | EDSS<br>0-2.5                                                                                                   | EDSS<br>3.0-5.5 | EDSS<br>6.0-7.5 | EDSS<br>8.0-9.5 |
|-----------------------------------------------------------|-----------------------------------------------------------------------------------------------------------------|-----------------|-----------------|-----------------|
| Calibration targets (Table 2)<br>for ARR by EDSS category | N/A                                                                                                             | <b>0.19</b>     | <b>0.12</b>     | <b>0.04</b>     |
|                                                           | Maximum age-related decrease (29%/5y) in<br>ARR, with no decrease by EDSS                                       |                 |                 |                 |
| Weighted ARR by p-y at<br>EDSS category                   | 0.26                                                                                                            | <b>0.17</b>     | <b>0.09</b>     | <b>0.06</b>     |
|                                                           | Final age-related decrease (28%/5y) in ARR,<br>66% decrease in ARR at EDSS scores 8.0-<br>9.5 relative to 0-5.5 |                 |                 |                 |
| Weighted ARR by p-y at<br>EDSS category                   | 0.26                                                                                                            | <b>0.17</b>     | <b>0.10</b>     | <b>0.03</b>     |

Key: ARR= annualized relapse rate; EDSS= Expanded Disability Status Scale; N/A= not applicable; p-y= person-years. Calibration targets for ARR by EDSS score categories are bolded.
